# Supplementary material
Source: publisher figshare collection journal article supplement (https://acs.figshare.com/ndownloader/files/7970593)

Supporting information for

**A Star-Shaped Molecule with Low-Lying Lowest Unoccupied  
Molecular Orbital Level, n-type Panchromatic Electrochromism, and  
Long-Term Stability**

Bin Yao, Yue Zhou, Xichong Ye, Rong Wang, Jie Zhang\* and Xinhua Wan\*

*Beijing National Laboratory for Molecular Sciences, Key Laboratory of Polymer Chemistry and Physics of Ministry of Education, College of Chemistry and Molecular Engineering, Peking University, Beijing 100871, China*

\*E-mail: [xhwan@pku.edu.cn](mailto:xhwan@pku.edu.cn) (Xinhua Wan); [jz10@pku.edu.cn](mailto:jz10@pku.edu.cn) (Jie Zhang).

|                                                             |         |
|-------------------------------------------------------------|---------|
| Part 1. General Information                                 | S1–S2   |
| Part 2. Experimental Procedures                             | S3–S6   |
| Part 3. TGA, DPV, Absorptions, EPR, and Electrochromic Data | S7–S9   |
| Part 4. XRD, DSC, POM, 1D-WAXD, 1D-WAXD                     | S10–S12 |
| Part 5. <sup>1</sup> H NMR and <sup>13</sup> C NMR Spectra  | S13–S17 |

**Part 1. General Information**

All reagents were obtained from J&K, Aldrich, Acros, and TCI Chemical Co., and used as received unless otherwise specified. CH<sub>2</sub>Cl<sub>2</sub> and CH<sub>3</sub>CN were purified by distillation over CaH<sub>2</sub>. <sup>1</sup>H NMR spectra and <sup>13</sup>C NMR spectra were measured on a Bruker ARX400 spectrometer (400 MHz) at the ambient temperature with CDCl<sub>3</sub> as the solvent and tetramethylsilane (TMS) as an internal standard. Chemical shifts were reported in ppm with TMS (0 ppm) as standard. High-resolution mass spectra were recorded on a Bruker APEXIV Fourier transform ion cyclotron resonance mass spectrometer. MALDI-TOF mass spectra were recorded on an ABI 4800 Plus MALDI TOF/TOF™ Analyzer.

UV-vis absorption spectra of the compounds were recorded on a Hitachi U-4100 spectrophotometer using 1-mm quartz cell. Thermogravimetric analyses (TGA) were performed on a TA Instrument Q600 analyzer under different gas a flow rate of 100 mL min<sup>-1</sup>. DSC measurements were performed on a TA Q100DSC analyzer under nitrogen with a heating rate of 20 °C /min and cooling rate of 2 °C /min.

Cyclic voltammetry and differential pulse voltammetry were carried out on a CHI840B electrochemical workstation. The solutions were made in CH<sub>2</sub>Cl<sub>2</sub> (5 × 10<sup>-4</sup> mol/L) containing 0.1 M tetra-n-butylammonium hexafluorophosphate (TBAPF<sub>6</sub>) as an electrolyte and were degassed with nitrogen prior to electrochemical work. Platinum working and counter electrodes were employed together with a silver pseudoreference electrode. The pseudo-reference was calibrated externally using a solution of ferrocene (Fc/Fc<sup>+</sup>). The scanning direction was negative since the reduction potentials were more concerned. Spectroelectrochemical data were performed on a Hitachi U-4100 spectrophotometer connected to a computer in an optical transparent thin layer (OTTLE) cell or through the thin film on ITO glass dipped into CH<sub>3</sub>CN/TBAPF<sub>6</sub> (0.1M) solution. The solvents CH<sub>2</sub>Cl<sub>2</sub> and CH<sub>3</sub>CN were distilled over CaH<sub>2</sub> prior to use. The ESR spectrum was recorded on a Bruker ESP-E500 spectrometer. For EPR experiment, the solution was sealed in glass capillary for measurement after reduction to radical anion state.

One-dimensional wide-angle X-ray diffraction (1D WAXD) experiments were run on a Philips X'Pert Pro diffractometer with a 3 kW ceramic tube as the X-ray source (Cu Ka) and an X'celerator detector. The sample stage was set horizontally. The reflection peak positions were calibrated against silicon powder (2θ > 15°) and silver behenate (2θ < 10°). Background scattering was recorded and subtracted from the sample patterns. Two-dimensional wide-angle X-ray diffraction (2D WAXD) experiments were performed on a Bruker D8 Discover diffractometer. The sample was oriented at 200 °C and then quenched to room temperature.

The geometry of the molecules was optimized with density functional theory (DFT) using B3LYP hybrid functional with a basis set limited to 6-31g+G(d). Each optimization was verified by frequency analysis for real energy minimization.

Molecular orbital shapes were performed at optimized geometries with theory level at B3LYP/6-31+G(d). Quantum-chemical calculation was performed with the Gaussian09 package<sup>1</sup> and the orbital pictures were prepared using Gaussview<sup>2</sup>. To simplify the calculations, the substituent on imide was simplified as a methyl group.

## Part 2. Experimental Procedures

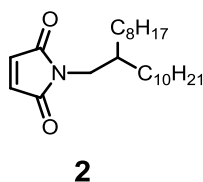

Maleic anhydride (0.98 g, 10 mmol), 2-octyldodecyl amine (3.13 g, 10.5 mmol), and 20 mL benzene was added into a three-neck flask under N<sub>2</sub>. The solution was stirred for 1 h at 30 °C, and then ZnBr<sub>2</sub> (2.25 g, 10.0 mmol) and hexamethyl disilazane (2.20 g, 13.6 mmol) were added. The resultant suspension was heated to reflux for another 2 hour. After cooling to room temperature, the mixture was poured into 60 mL of 0.5 M aqueous HCl and extracted with 3 × 40 mL CH<sub>3</sub>COOEt. The combined organic phase was washed with saturated NaHCO<sub>3</sub> solution several times and then washed with saturated NaCl once, dried with Na<sub>2</sub>SO<sub>4</sub>, and filtered, and the solvent was removed under reduced pressure. The crude product was purified by silica gel chromatography (CH<sub>2</sub>Cl<sub>2</sub>/petroleum ether = 1/1 (v/v) as eluent, *R<sub>f</sub>* = 0.60) to afford a colorless transparent liquid (3.16 g) in 84% yield. <sup>1</sup>H NMR (400 MHz, CDCl<sub>3</sub>): δ 6.68 (s, 1H), 3.40 (d, *J* = 7.2 Hz, 2H) 1.76 (m, 1H), 1.32–1.20 (m, 32H), 0.88(t, *J* = 6.8 Hz, 6H). <sup>13</sup>C NMR (100 MHz, CDCl<sub>3</sub>): δ 171.15, 133.96, 42.15, 36.96, 31.93, 31.90, 31.40, 29.98, 29.65, 29.64, 29.59, 29.54, 29.35, 29.30, 26.25, 22.69, 22.68, 14.12. ESI-HRMS [M+H]<sup>+</sup>: 378.33578, C<sub>24</sub>H<sub>44</sub>NO<sub>2</sub> requires 378.33666.

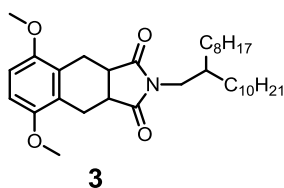

1,4-dimethoxy-2,3-bis(bromomethyl)benzene<sup>3</sup> (1.30 g, 4.00 mmol), compound **2** (1.59 g, 4.10 mmol), NaI (3.00 g, 20.0 mmol), and DMF (25 mL) were successively added to a 100 mL three-neck flask under N<sub>2</sub>. The mixture turned a brown/black color during the reaction system was heated to 90 °C and was stirred for 48 h at 90 °C under N<sub>2</sub>. After cooling to room temperature, the mixture were poured into 100 mL water and extracted with 3 × 50 mL CH<sub>2</sub>Cl<sub>2</sub>. The combined organic phase was washed with 3 × 150 mL 0.5 M NaHSO<sub>3</sub> aqueous solution, 3 × 150 mL dilute HCl aqueous solution and then 200 mL saturated NaCl once, dried with Na<sub>2</sub>SO<sub>4</sub>, and filtered, and the solvent was removed under reduced pressure. The crude product was purified by silica gel chromatography (CH<sub>2</sub>Cl<sub>2</sub> as eluent, *R<sub>f</sub>* = 0.40) to afford a light yellow oily liquid (1.14 g) in 53% yield. <sup>1</sup>H NMR (400 MHz, CDCl<sub>3</sub>): δ 6.67 (s, 1H), 3.74 (s, 6H), 3.56–3.48 (m, 2H), 3.26–3.18 (m, 4H), 3.64–3.56 (m, 2H), 1.46 (m, 1H), 1.32–1.04 (m, 28H), 0.92–0.72 (m, 10H). <sup>13</sup>C NMR (100 MHz, CDCl<sub>3</sub>): δ 179.85, 150.75, 125.20, 109.75, 56.44, 42.73, 39.42, 35.99, 31.93, 30.68, 29.90, 29.70, 29.67, 29.66, 29.37, 29.35, 25.99, 22.69, 21.80, 14.12. ESI-HRMS [M+H]<sup>+</sup>: 542.42156, C<sub>34</sub>H<sub>56</sub>NO<sub>4</sub> requires 542.42039.

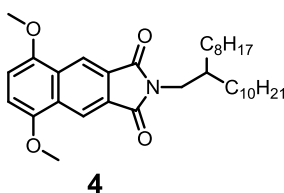

0.45 g TsOH·H<sub>2</sub>O and 60 mL toluene were added to a 150 mL three-neck flask which equipped a manifold. The mixture were heated to reflux for 3 h to remove the crystal water in TsOH·H<sub>2</sub>O. After cooling to room temperature, compound **3** (1.14 g, 2.10 mmol) and 2,3-dichloro-5,6-dicyanobenzoquinone (DDQ, 1.69 g, 7.50 mmol) were added to the flask, respectively. The solution turned red/black immediately when DDQ was added and was heated to reflux for another 24 h. After cooling to room temperature, the solution was filtrated and washed three times with toluene. Toluene

was removed under reduced pressure, and 100 mL CH<sub>2</sub>Cl<sub>2</sub> was added to dissolve the residue. The organic solution was washed with 3 × 100 mL saturated NaHCO<sub>3</sub> and 150 mL saturated NaCl once, dried with Na<sub>2</sub>SO<sub>4</sub>, and filtered, and the solvent was removed under reduced pressure. The crude product was purified by silica gel chromatography (CH<sub>2</sub>Cl<sub>2</sub>/petroleum ether = 4/3(v/v) as eluent, *R<sub>f</sub>* = 0.50) to afford a yellow waxy solid (0.46 g) in 40% yield. <sup>1</sup>H NMR (400 MHz, CDCl<sub>3</sub>): δ 8.72 (s, 2H), 6.91 (s, 2H), 3.99 (s, 6H), 3.63 (d, *J* = 7.2 Hz), 1.94 (m, 1H), 1.40–1.18 (m, 32H), 0.89–0.83 (m, 6H). <sup>13</sup>C NMR (100 MHz, CDCl<sub>3</sub>): δ 168.64, 150.95, 128.19, 127.60, 119.11, 107.18, 56.02, 42.57, 36.95, 31.92, 31.90, 31.58, 29.98, 29.63, 29.58, 29.55, 29.34, 29.30, 26.33, 22.68, 14.11, 14.09. ESI-HRMS [*M*+*H*]<sup>+</sup>: 538.38998, C<sub>34</sub>H<sub>52</sub>NO<sub>4</sub> requires 538.38909.

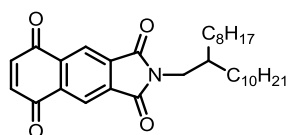

**5**

Compound **4** (0.50 g, 0.93 mmol) and 180 mL CH<sub>3</sub>CN were added to a 250 mL round bottom flask, and the mixture were stirred for 2 h to form a homogeneous solution at 30 °C. Ceric ammonium nitrate (CAN, 1.27 g, 2.30 mmol) dissolved in 16 mL CH<sub>3</sub>CN-H<sub>2</sub>O (v/v=1/1) was added dropwise into the solution during 15 minutes, and stirring was continued for 2 h until the compound **4** was consumed which detected by TLC analysis. After most solvent was removed under reduced pressure, 100 mL CH<sub>2</sub>Cl<sub>2</sub> was added to dissolve the remaining solid. The organic solution was washed with 3 × 100 mL saturated NaCl, dried with Na<sub>2</sub>SO<sub>4</sub>, and filtered, and the solvent was removed under reduced pressure. The crude product was purified by silica gel chromatography (CH<sub>2</sub>Cl<sub>2</sub> as eluent, *R<sub>f</sub>* = 0.55) to afford a yellow solid (0.40 g) in 85% yield. <sup>1</sup>H NMR (400 MHz, CDCl<sub>3</sub>): δ 8.57 (s, 2H), 7.14 (s, 2H), 3.64 (d, *J* = 7.2 Hz, 2H), 1.90 (m, 1H), 1.38–1.22 (m, 32H), 0.90–0.84 (tt, 6H). <sup>13</sup>C NMR (100 MHz, CDCl<sub>3</sub>): δ 183.24, 166.69, 138.91, 136.29, 135.80, 121.71, 43.00, 36.97, 31.92, 31.88, 31.49, 29.93, 29.62, 29.57, 29.52, 29.34, 29.28, 26.25, 22.68, 22.67, 14.11. ESI-HRMS [*M*+*H*]<sup>+</sup>: 508.34154, C<sub>32</sub>H<sub>46</sub>NO<sub>4</sub> requires 508.34214.

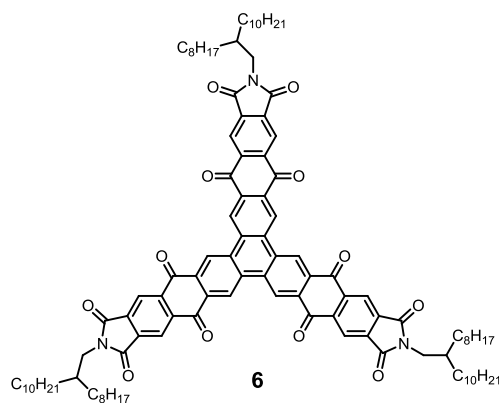

Compound **5** (251.3 mg, 0.50 mmol), hexakisbromomethylbenzene<sup>4</sup> (95.3 mg, 0.15 mmol), NaI (337 mg, 2.25 mmol) and DMF (4.5 mL) were successively added into a 25 mL three-neck flask under N<sub>2</sub>. The mixture were heated to 90 °C and stirred for 48 h under N<sub>2</sub>. After cooling to room temperature, 15 mL acetone was added and the mixture was stirred for another 30 minutes until the viscous material became solid powder. The mixture were filtered and washed successively with water and acetone until the filtrate was colorless transparent. The residue solid was purified by silica gel chromatography (CH<sub>2</sub>Cl<sub>2</sub>/CH<sub>3</sub>COOEt = 100/1 as eluent, *R<sub>f</sub>* = 0.75) to afford a yellow solid (57 mg) in 23% yield. <sup>1</sup>H NMR (400 MHz, CDCl<sub>3</sub>): δ 9.43 (s, 6H), 8.77 (s, 6H), 3.74 (d, *J* = 7.2 Hz, 2H), 1.99 (m, 3H), 1.40–1.22 (m, 96H), 0.90–0.84 (m, 18H). <sup>13</sup>C NMR (100 MHz, CDCl<sub>3</sub>): δ 180.13, 166.41, 137.82, 136.47, 133.50, 131.98, 124.91, 122.71, 43.20, 37.11, 31.95, 31.94, 31.53, 30.08, 29.73, 29.70, 29.65, 29.40, 29.37, 26.33, 22.71, 14.14, 14.13. MALDI-TOF [M+H]<sup>+</sup>: 1668.01, C<sub>108</sub>H<sub>136</sub>N<sub>3</sub>O<sub>12</sub> requires 1668.01. Anal. Calcd for C<sub>108</sub>H<sub>136</sub>N<sub>3</sub>O<sub>12</sub>: C, 77.80; H, 8.16; N, 2.52. Found: C, 77.72; H, 8.16; N, 2.29.

### Part 3. TGA, DPV, Absorptions, EPR, and Electrochromic Data

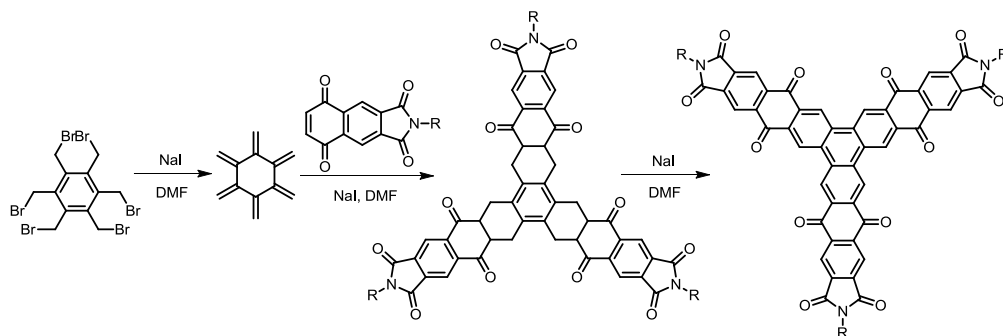

**Scheme S1.** Detailed reaction processes in the last D-A reaction in the synthesis of **6**.

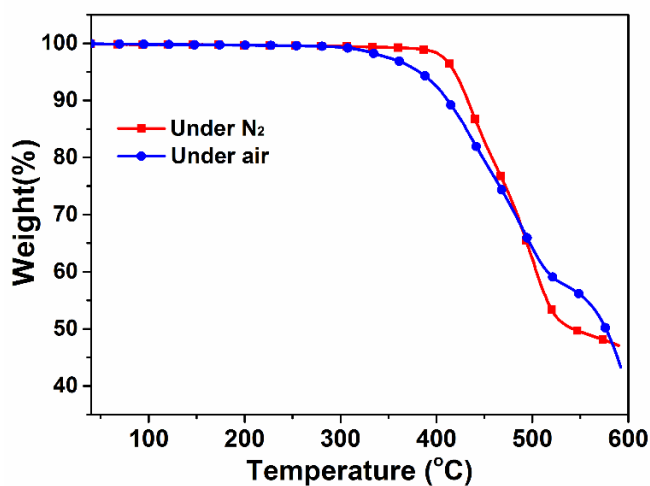

**Figure S1.** TGA curves of **6** under N<sub>2</sub> (red line) and air (blue line).

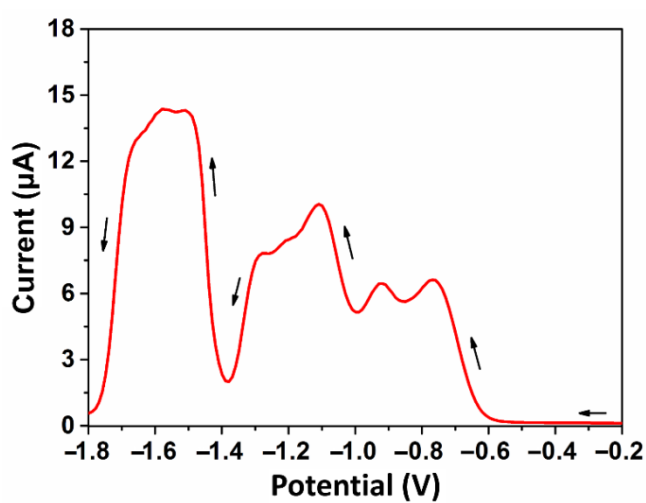

**Figure S2.** DPV of **6** in CH<sub>2</sub>Cl<sub>2</sub> solution at ambient temperature,  $c = 5 \times 10^{-4}$  mol/L, 0.1 M TBAPF<sub>6</sub> as an electrolyte, potentials vs Fc/Fc<sup>+</sup>. The black arrows indicate the scanning directions, and the starting point was the less negative side.

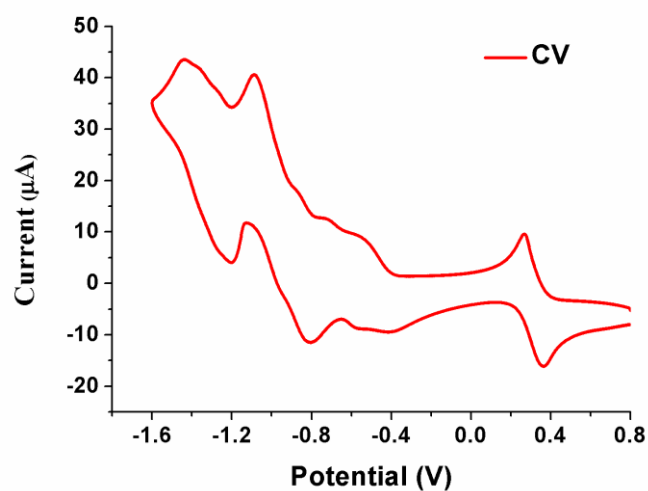

**Figure S3.** Cyclic voltammogram of **6** and ferrocene as internal standard in  $\text{CH}_2\text{Cl}_2$  solution at ambient temperature.  $c = 5 \times 10^{-4}$  mol/L,  $\nu = 100$  mV/s, 0.1 M TBAPF<sub>6</sub> as supporting electrolyte.

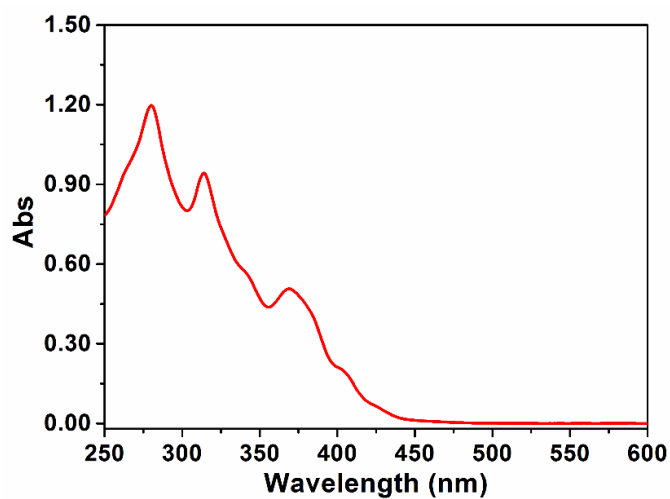

**Figure S4.** Absorptions of **6** in its neutral state in  $\text{CH}_2\text{Cl}_2$  solution,  $c = 1.0 \times 10^{-5}$  mol/L.

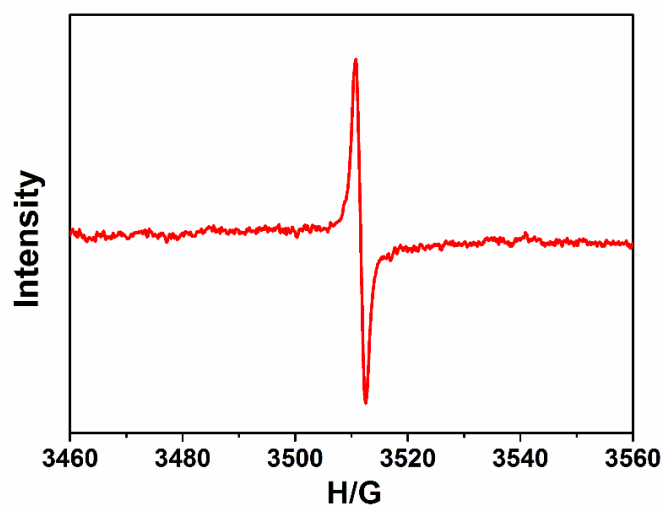

**Figure S5.** EPR of **6** radical anion in dilute  $\text{CH}_2\text{Cl}_2$  solution.



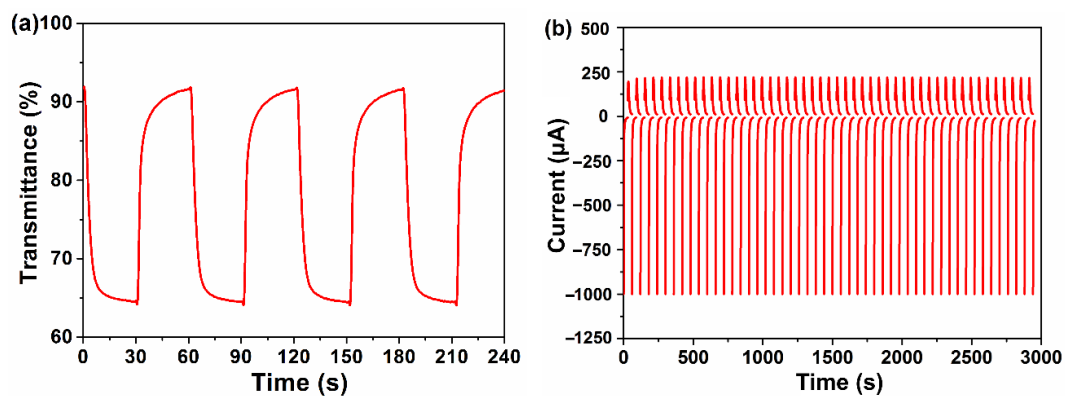

**Figure S6.** (a) Time response and (b) first 50 cyclic current stability of **6** thin film on ITO glass dipped into  $\text{CH}_3\text{CN/TBAPF}_6$  (0.1 M) solution between  $-0.75$  and  $0.10$  V (potentials vs  $\text{Fc/Fc}^+$ ). The amount of  $\text{O}_2$  was estimated to be  $\sim 739$  mg/L and the amount of  $\text{H}_2\text{O}$  was estimated to be  $\sim 500$  mg/L in the commercially-available anhydrous acetonitrile (A.R.).

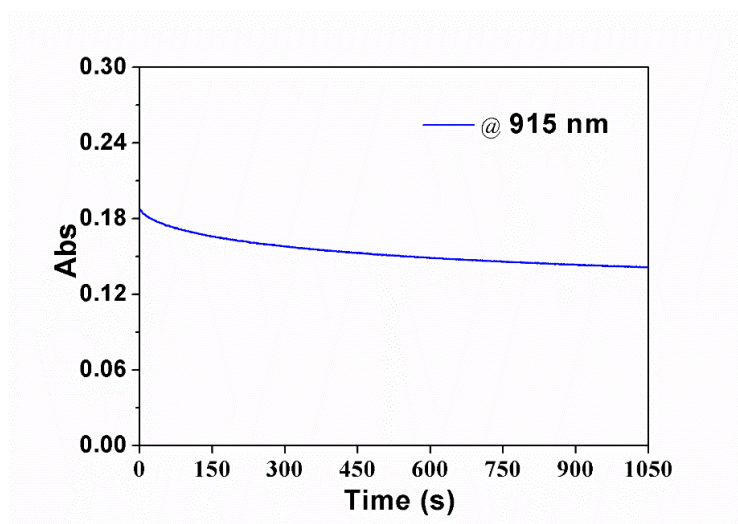

**Figure S7.** Changes of absorption intensity at 915 nm of the **6** radical anion with time after removal of external voltage

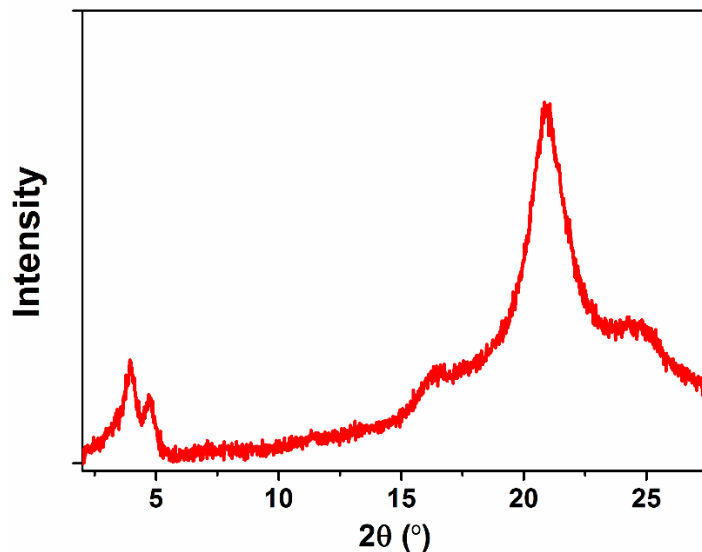

**Figure S8.** 1D WAXD of **6** thin film at room temperature.

**Table S1.** 1D WAXD patterns data of **6** thin film at room temperature.

|       | 2θ/degree | d/Å   |
|-------|-----------|-------|
| Peak1 | 3.942     | 22.40 |
| Peak2 | 21.07     | 4.213 |

Distances are calculated according to the Bragg's Law:  $2d\sin\theta=\lambda$ , Where  $\lambda$  is 1.5406 Å.

## Formation of Columnar Liquid Crystalline Phase

Further experiments have been carried out to verify its columnar liquid crystalline properties in the solid state instead of the thin film. Thermal behavior of the powder **6** in the solid state were investigated by differential scanning calorimetry (DSC), polarizing optical microscopy (POM), 1-D Wide angle X-ray diffraction (1D WAXD) and 2-D Wide Angle X-ray Diffraction (2-D WAXD).

In the first heating process of DSC, a weak exothermic peak appears at 145 °C (Figure S9. a); meanwhile, a conic texture was observed at 200 °C by POM (Figure S9. b). The conic texture is a typical texture for discotic mesogens in hexagonal columnar crystal phase or rectangular columnar mesophase. Combining with 1-D and 2D WAXD (Figure S9. c and d) curves, we can conclude that liquid crystalline phase has been formed. We can calculate structural parameters of the liquid crystal phase through the following equation:

$$1/d^2 = h^2/a^2 + k^2/b^2$$

Where  $h$ ,  $k$  refer to reciprocal vectors,  $d$  is the inter-planar spacing,  $a$  and  $b$  are lengths in the  $a$  axis and the  $b$  axis directions of the liquid crystal structure. The calculation results were summarized in Table S2.  $a$  and  $b$  was calculated from the first two diffraction peaks, and their values match well with the measured one. By further comparing the reciprocal vectors, we can also conclude that it forms rectangular columnar liquid crystal phase in the  $p2gg$  symmetry.

At elevated temperature  $\sim 240\text{ }^{\circ}\text{C}$ , the disappearance of birefringence in the POM test and the disappearance of characteristic diffraction peaks in 1D WAXD curves verify that **6** turns into the isotropic phase. In the cooling process, the isotropic phase system reversibly recovered to the liquid crystal phase. The phase transitions of **6** powders with temperature were demonstrated in Scheme S1.

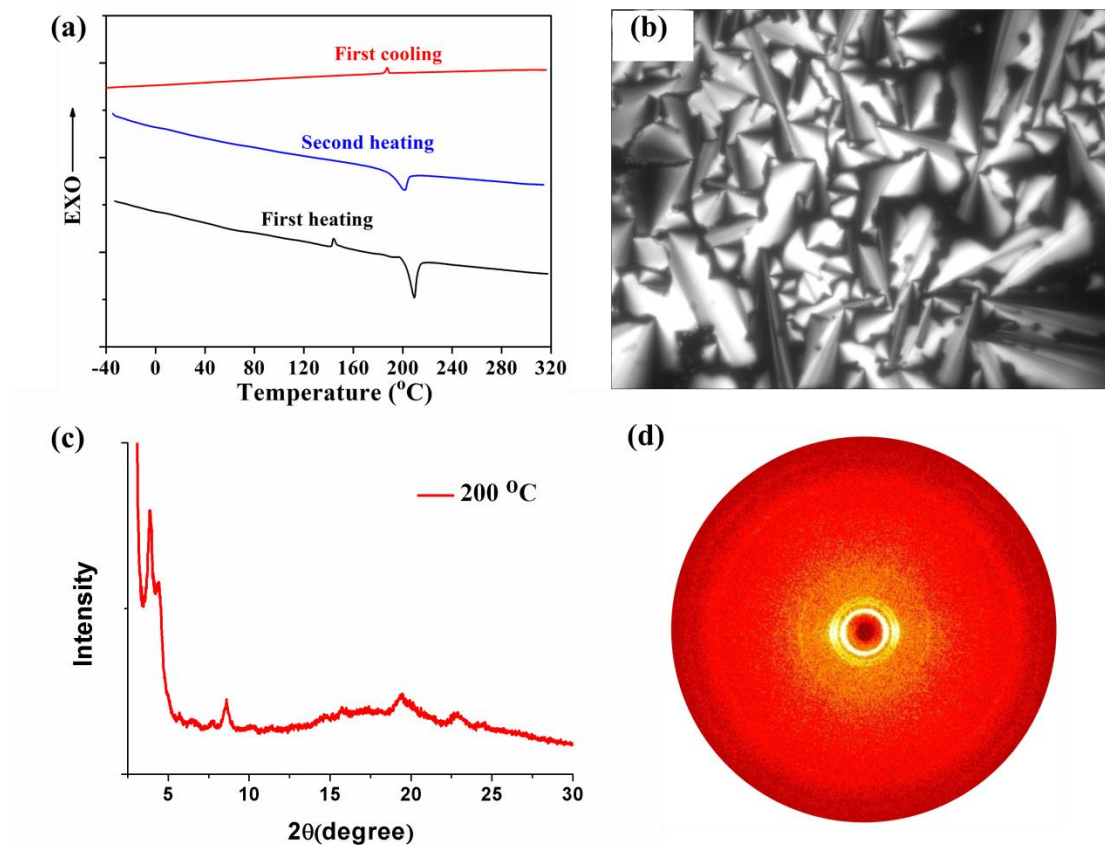

**Figure S9.** (a) DSC curves for compounds **6** with a heating–cooling scan rate of  $10\text{ }^{\circ}\text{C min}^{-1}$  under nitrogen; (b) POM images of **6** at  $200\text{ }^{\circ}\text{C}$  upon heating; (c) 1D WAXD of **6** powders at  $200\text{ }^{\circ}\text{C}$ ; (d) 2-D WAXD image of oriented **6** powders after heating.

**Table S2.** Structural parameters of **6** measured for each diffraction peak in liquid crystal state.

| Entry                                          | hk | $d_{\text{measured}}/\text{\AA}$ | $d_{\text{calculated}}/\text{\AA}$ |
|------------------------------------------------|----|----------------------------------|------------------------------------|
| a = $61.4\text{ \AA}$<br>b = $24.7\text{ \AA}$ | 20 | 30.7                             | 30.7                               |
|                                                | 11 | 22.9                             | 22.9                               |
|                                                | 31 | 15.6                             | 15.8                               |
|                                                | 22 | 11.5                             | 11.5                               |
|                                                | 32 | 10.4                             | 10.6                               |

**Scheme S1.** Phase transitions of **6** in the process of heating and cooling

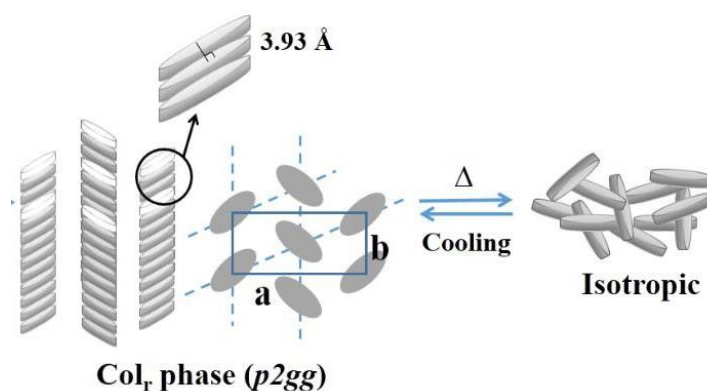

## References

- (1) Frisch, M. J.; Trucks, G. W.; Schlegel, H. B.; Scuseria, G. E.; Robb, M. A.; Cheeseman, J. R.; Scalmani, G.; Barone, V.; Mennucci, B.; Petersson, G. A.; Nakatsuji, H.; Caricato, M.; Li, X.; Hratchian, H. P.; Izmaylov, A. F.; Bloino, J.; Zheng, G.; Sonnenberg, J. L.; M. Hada; Ehara, M.; Toyota, K.; Fukuda, R.; Hasegawa, J.; Ishida, M.; Nakajima, T.; Y. Honda; Kitao, O.; Nakai, H.; Vreven, T.; Montgomery, J. A.; Peralta, J. E.; Ogliaro, F.; Bearpark, M.; Heyd, J. J.; Brothers, E.; Kudin, K. N.; Staroverov, V. N.; Kobayashi, R.; Normand, J.; Raghavachari, K.; Rendell, A.; Burant, J. C.; Iyengar, S. S.; Tomasi, J.; Cossi, M.; Rega, N.; Millam, J. M.; Klene, M.; Knox, J. E.; Cross, J. B.; Bakken, V.; Adamo, C.; Jaramillo, J.; Gomperts, R.; Stratmann, R. E.; Yazyev, O.; Austin, A. J.; Cammi, R.; Pomelli, C.; Ochterski, J. W.; Martin, R. L.; Morokuma, K.; Zakrzewski, V. G.; Voth, G. A.; Salvador, P.; Dannenberg, J. J.; Dapprich, S.; Daniels, A. D.; Farkas, Ö.; Foresman, J. B.; Ortiz, J. V.; Cioslowski, J.; Fox, D. J., *Gaussian09*; Gaussian, Inc.: Wallingford, CT, 2009.
- (2) Dennington, R.; Keith, T.; Millam, J.; *GaussView, Version 3.09*; Semichem, Inc.: Shawnee Mission, KS, 2009.
- (3) Ardecky, R. J.; Kerdesky, F. A. J.; Cava, M. P. *J. Org. Chem.* **1981**, *46*, 1483-1485.
- (4) Hardy, A. D. U.; Macnicol, D. D.; Wilson, D. R. *J. Chem. Soc., Perkin Trans. 2* **1979**, *7*, 1011–1019.

## Part 4. $^1\text{H}$ NMR and $^{13}\text{C}$ NMR Spectra

Compound **2**,  $^1\text{H}$  NMR (400 MHz,  $\text{CDCl}_3$ )

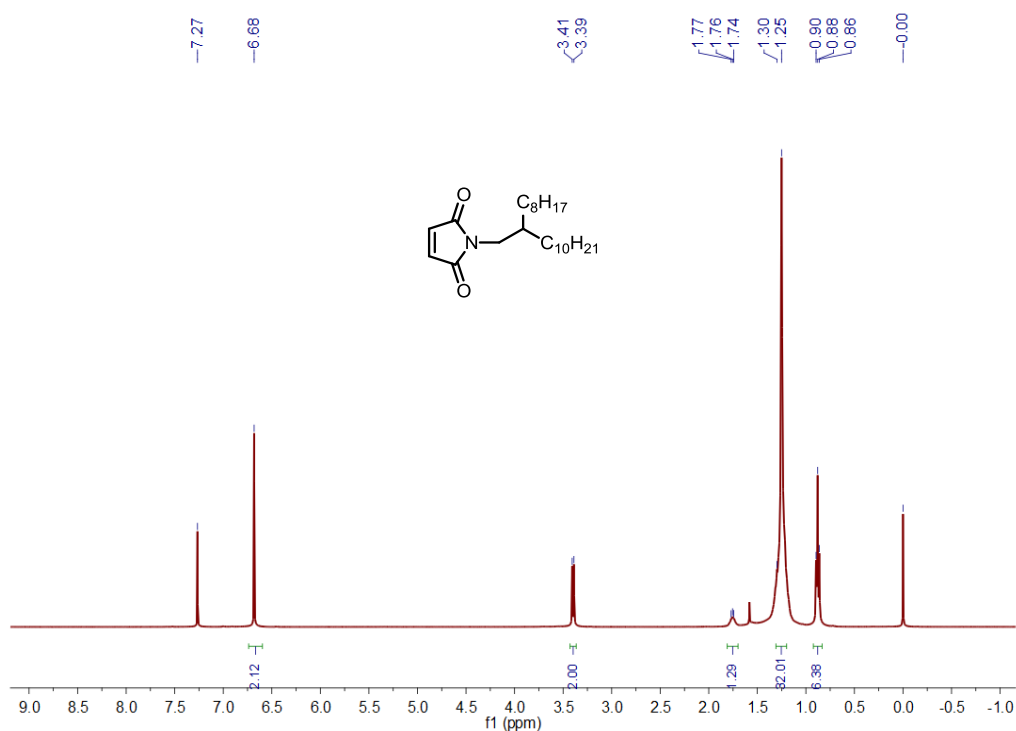

Compound **2**,  $^{13}\text{C}$  NMR (100 MHz,  $\text{CDCl}_3$ )

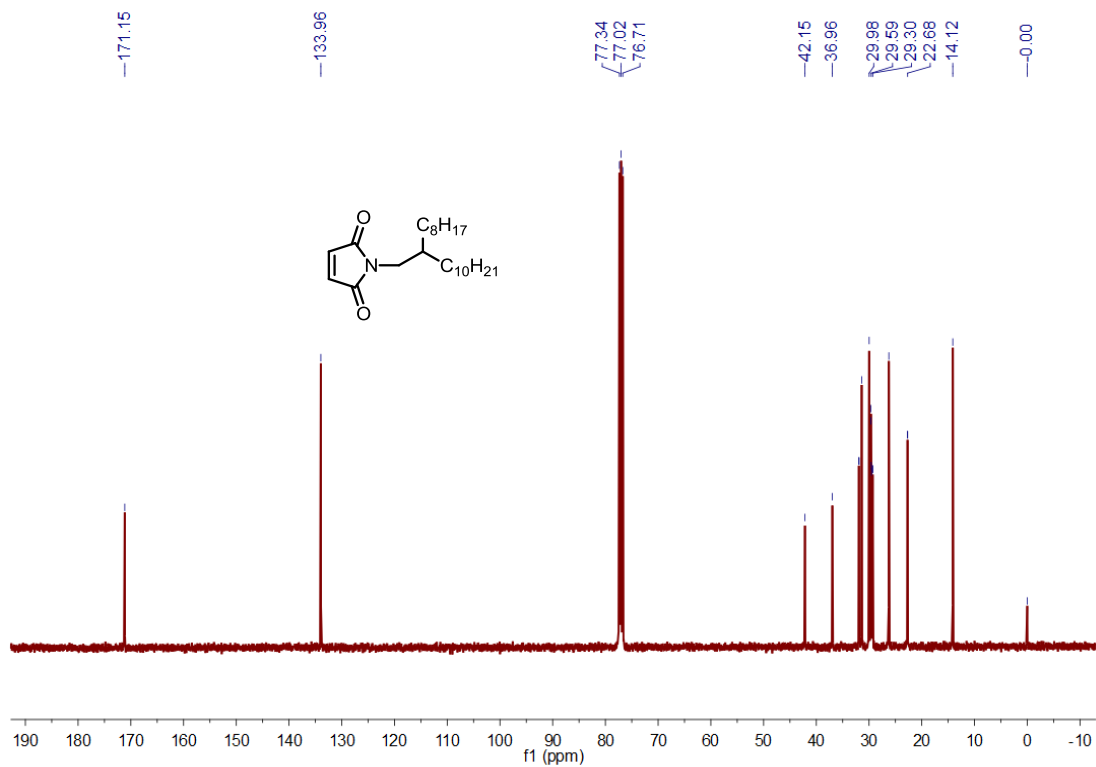

Compound **3**,  $^1\text{H}$  NMR (400 MHz,  $\text{CDCl}_3$ )

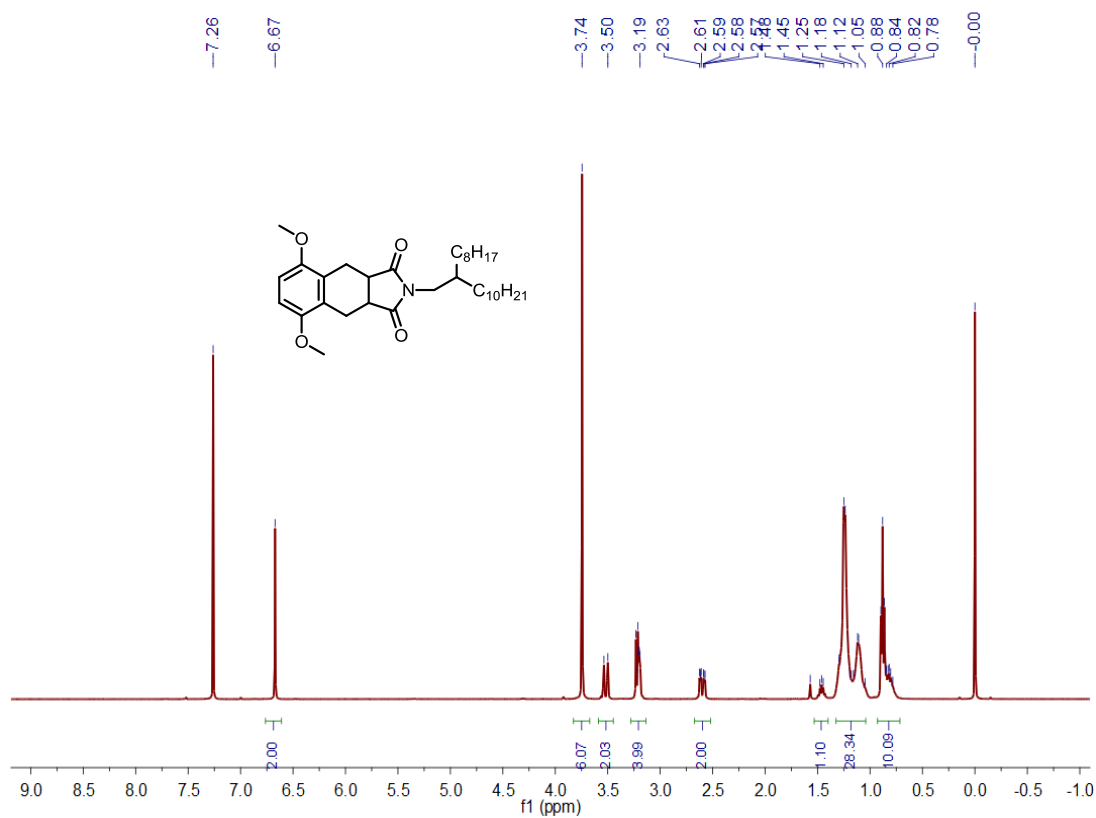

Compound **3**,  $^{13}\text{C}$  NMR (100 MHz,  $\text{CDCl}_3$ )

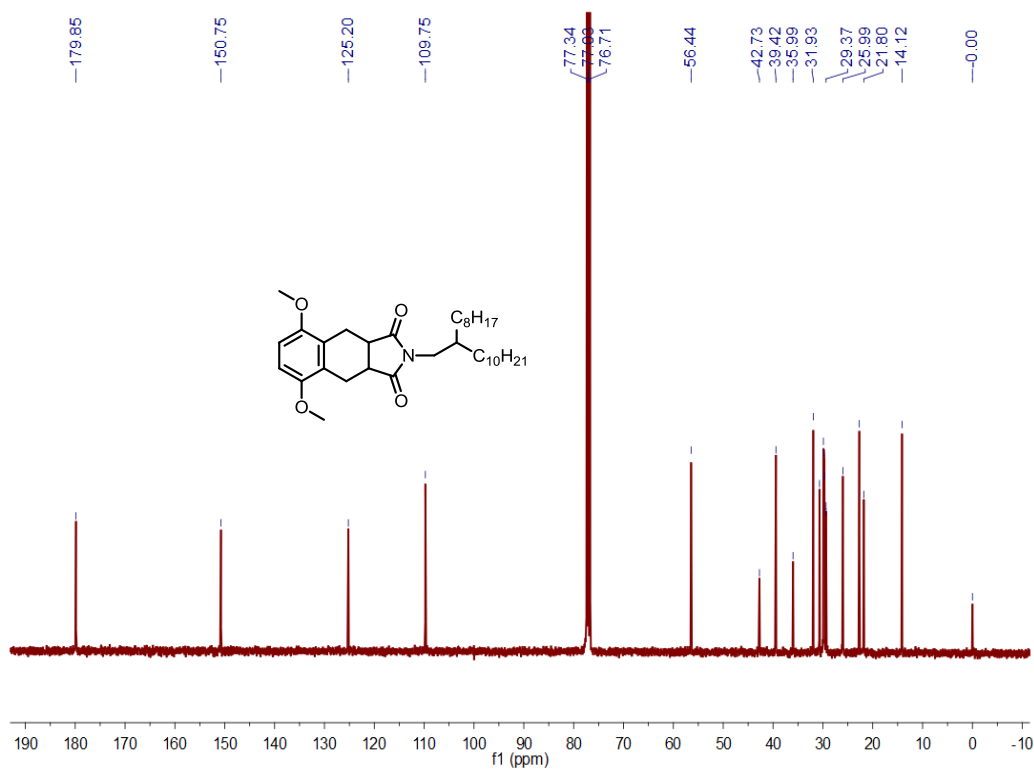

Compound **4**,  $^1\text{H}$  NMR (400 MHz,  $\text{CDCl}_3$ )

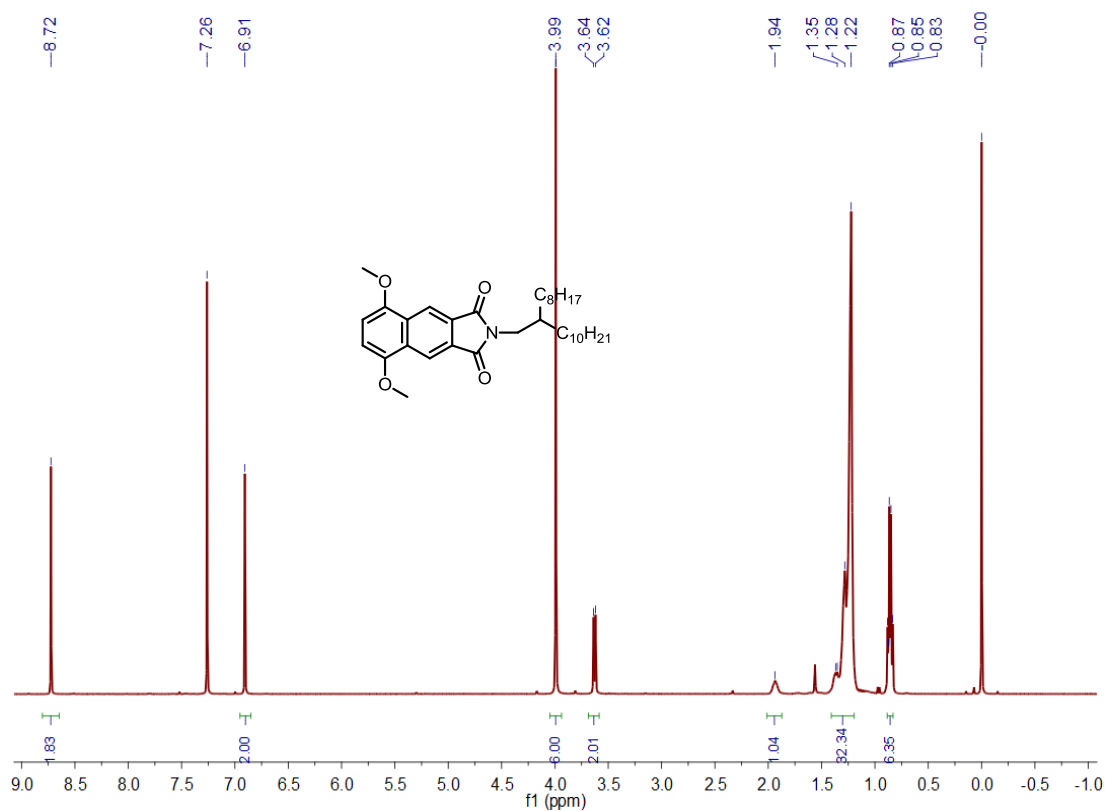

Compound **4**,  $^{13}\text{C}$  NMR (100 MHz,  $\text{CDCl}_3$ )

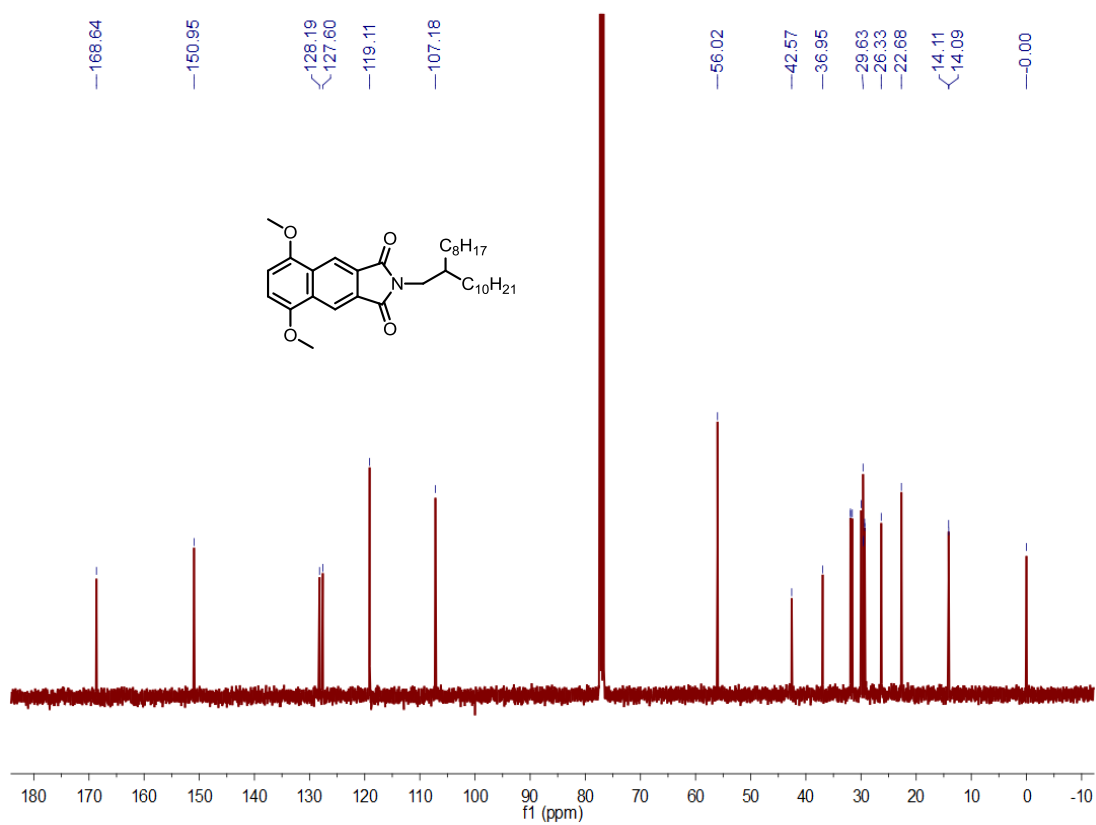

Compound **5**,  $^1\text{H}$  NMR (400 MHz,  $\text{CDCl}_3$ )

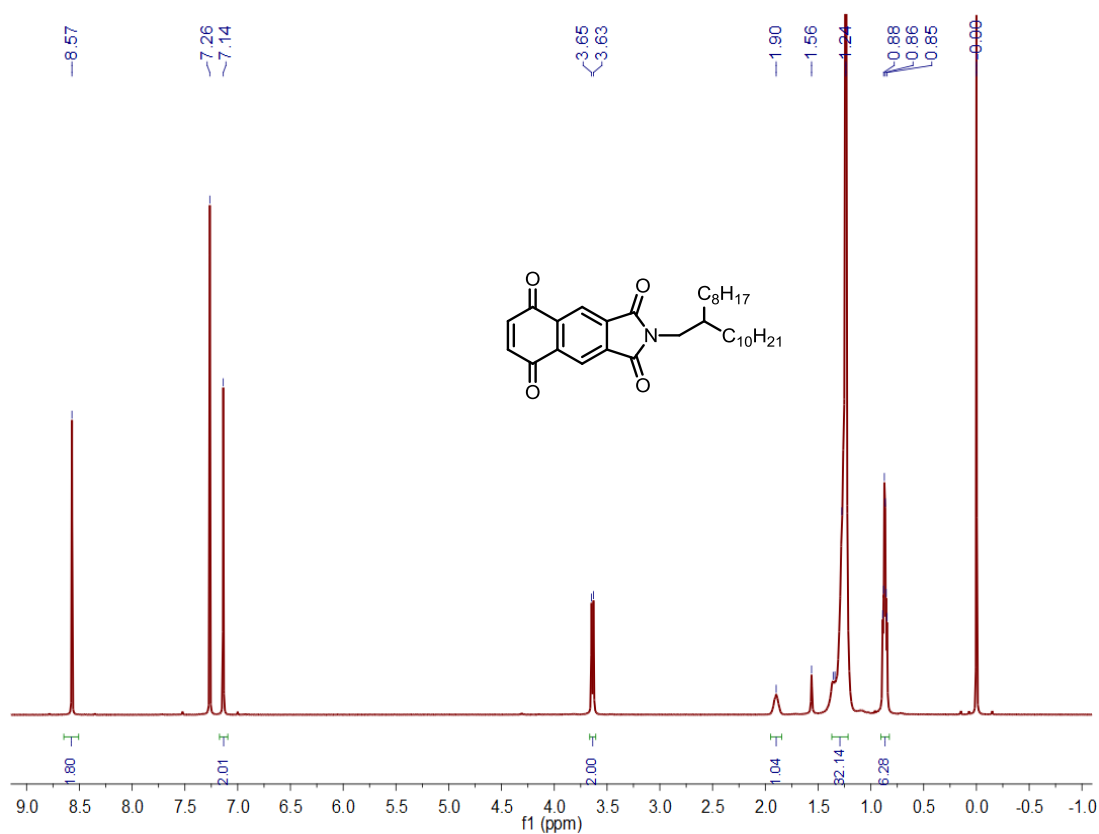

Compound **5**,  $^{13}\text{C}$  NMR (100 MHz,  $\text{CDCl}_3$ )

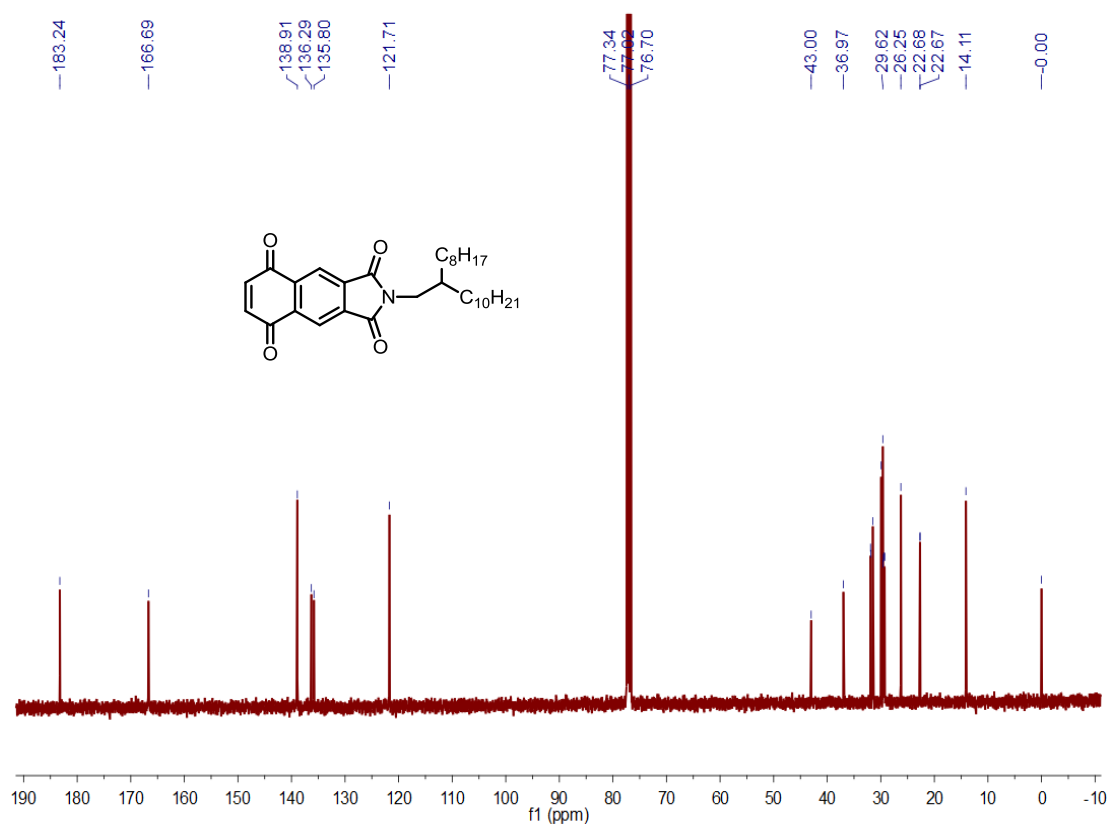



Compound **6**,  $^1\text{H}$  NMR (400 MHz,  $\text{CDCl}_3$ )

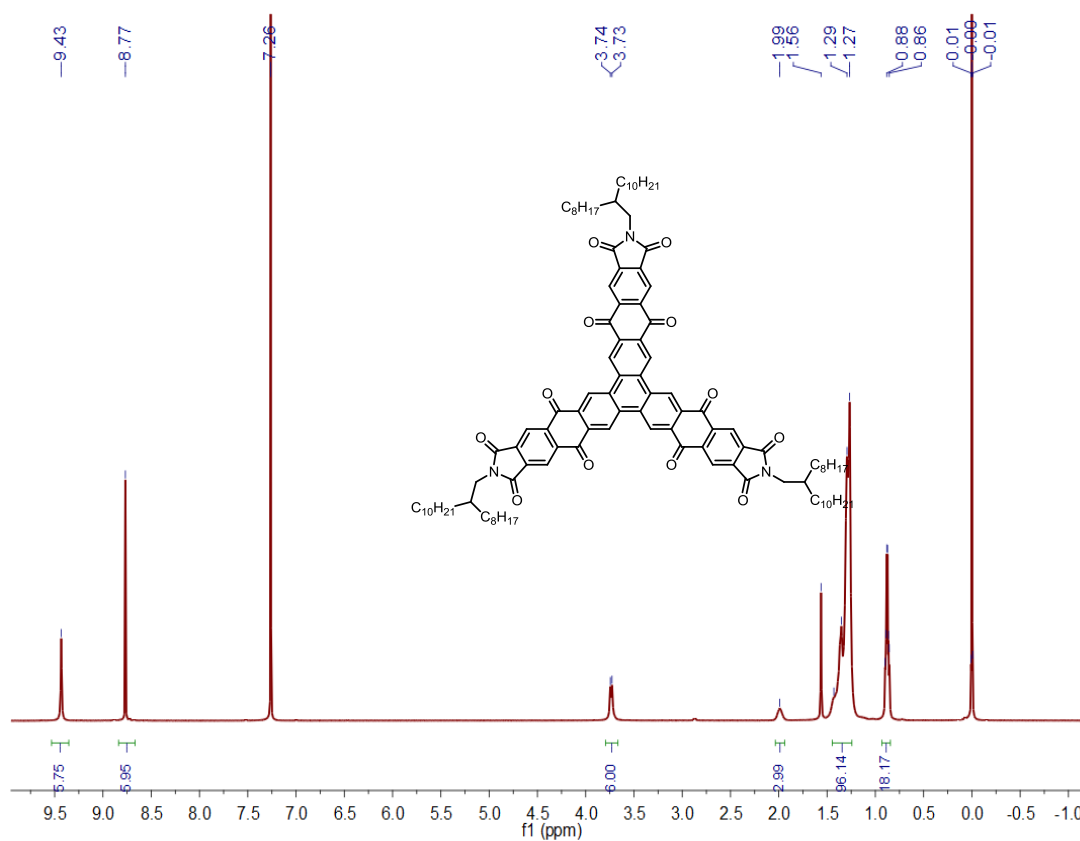

Compound **6**,  $^{13}\text{C}$  NMR (100 MHz,  $\text{CDCl}_3$ )

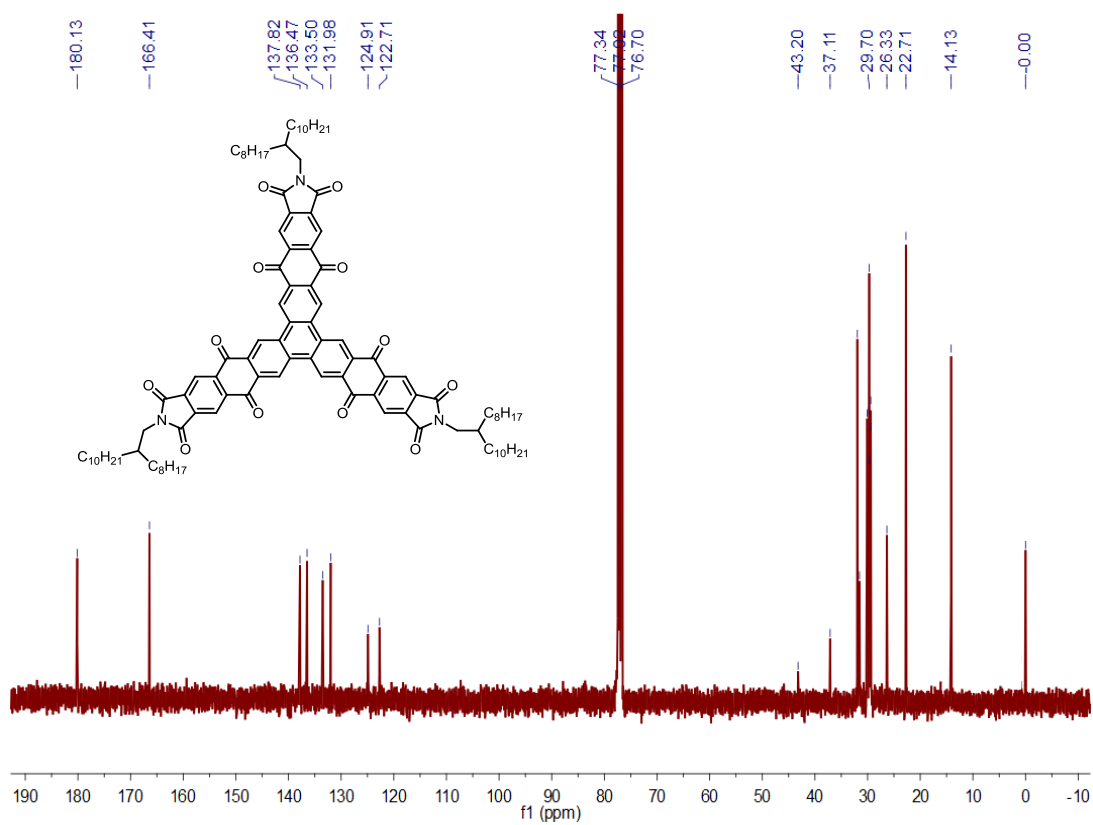

Supplement: Supplementary file 1 [file 7970593]
